# Supplementary material for: White Matter Alterations in Military Service Members With Remote Mild Traumatic Brain Injury
Source: PubMed Central journal article supplement (PMC11161843; doi:10.1001/jamanetworkopen.2024.8121), 2024-04-18
Supplement: jamanetwopen-e248121-s002.pdf [file jamanetwopen-e248121-s002.pdf]

## Data Sharing Statement

Kim. White Matter Alterations in Military Service Members With Remote Mild Traumatic Brain Injury. *JAMA Netw Open*. Published April 18, 2024. doi:10.1001/jamanetworkopen.2024.8121

### Data

**Data available:** Yes

**Data types:** Deidentified participant data

**How to access data:** Email: [pinghongyeh@gmail.com](mailto:pinghongyeh@gmail.com)

**When available:** With publication

### Supporting Documents

**Document types:** Statistical/analytic code, Informed consent form

**How to access documents:** [pinghongyeh@gmail.com](mailto:pinghongyeh@gmail.com)

**When available:** With publication

### Additional Information

**Who can access the data:** anyone requesting the data

**Types of analyses:** for non-commercial purpose

**Mechanisms of data availability:** with investigator support and with a signed data access agreement
